# Supplementary material for: Human serum albumin-based doxorubicin prodrug nanoparticles with tumor pH-responsive aggregation-enhanced retention and reduced cardiotoxicity
Source: Royal Society of Chemistry journal article supplement (doi:10.1039/d0tb00327a), 2020-01-01
Supplement: d0tb00327a1.pdf [file d0tb00327a1.pdf]

Supporting information of

# Human serum albumin-based doxorubicin prodrug nanoparticles with tumor pH-responsive aggregation-enhanced retention and reduced cardiotoxicity

Boya Zhang<sup>a</sup>, Shiyu Wan<sup>b</sup>, Xinyu Peng<sup>a</sup>, Mingying Zhao<sup>b</sup>, Sai Li<sup>b</sup>, Yuji Pu<sup>\*a</sup>, and Bin He<sup>a</sup>

<sup>a</sup> *National Engineering Research Center for Biomaterials, Sichuan University, Chengdu 610064, China*

<sup>b</sup> *School of Chemical Engineering, Sichuan University, Chengdu 610065, China*

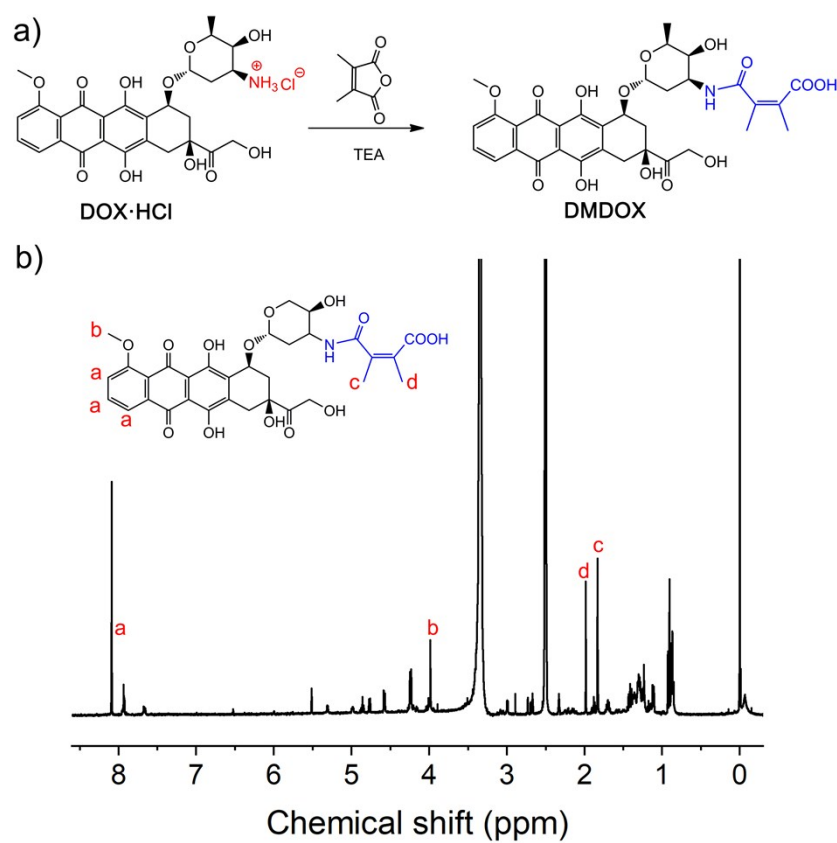

**Figure S1.** (a) Synthetic scheme of DMDOX. (b)  $^1\text{H}$  NMR spectrum of DMDOX in  $\text{DMSO}-d_6$ .

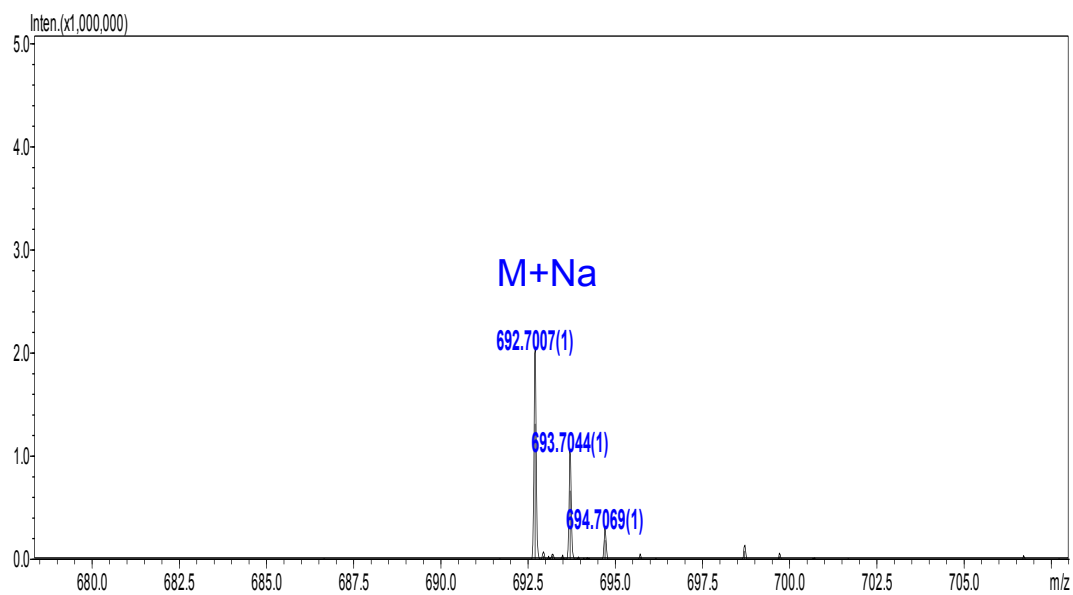

**Figure S2.** ESI-MS spectrum of DMDOX.

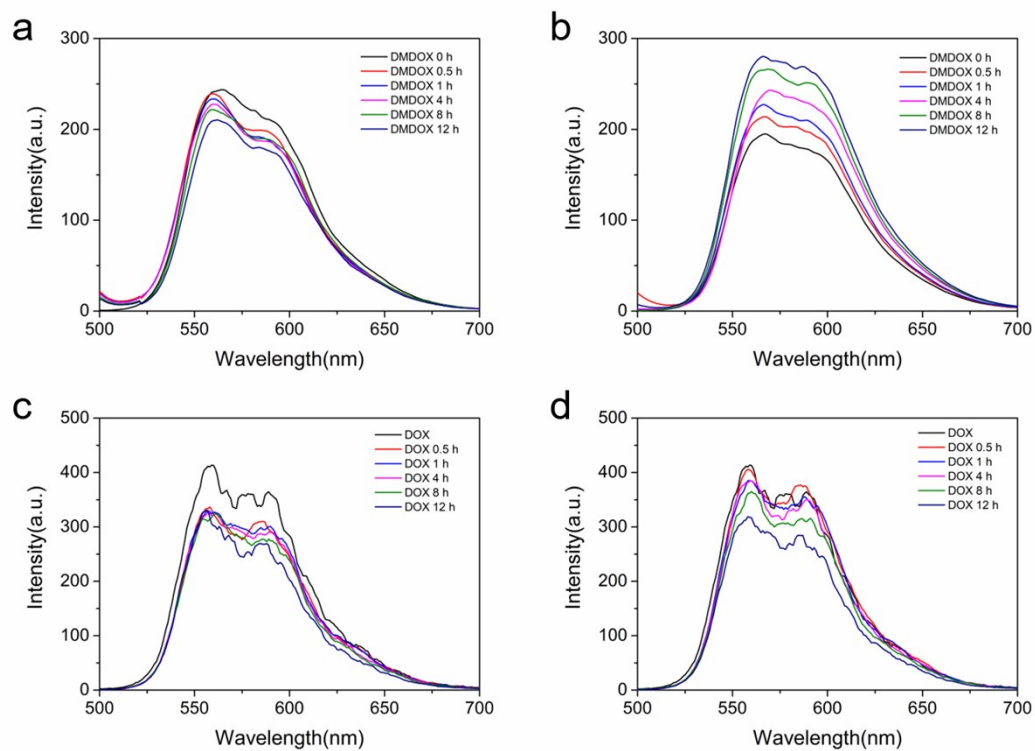

**Figure S3.** Fluorescence intensity of DMDOX and DOX in different pH conditions. (a-b)

Fluorescence emission spectra of DMDOX at pH 7.4 (a) and 6.5 (b) within 12 h. (c-d) Fluorescence emission spectra of DOX at pH 7.4 (a) and 6.5 (b) within 12 h.

**Table S1.** DLCs and DLEs of HSA-DOX and HSA-DMDOX with different feeding molar ratios of HSA to DOX.

| Samples        | Feeding molar ratio<br>of HSA to DOX | DLCs | DLEs  |
|----------------|--------------------------------------|------|-------|
| HSA-DOX 1:5    | 1:5                                  | 3.3% | 78.9% |
| HSA-DMDOX 1:5  | 1:5                                  | 1.8% | 37.6% |
| HSA-DOX 1:10   | 1:10                                 | 6.9% | 85.8% |
| HSA-DMDOX 1:10 | 1:10                                 | 3.3% | 36.1% |
| HSA-DOX 1:20   | 1:20                                 | 7.2% | 48.9% |
| HSA-DMDOX 1:20 | 1:20                                 | 3.6% | 21.6% |

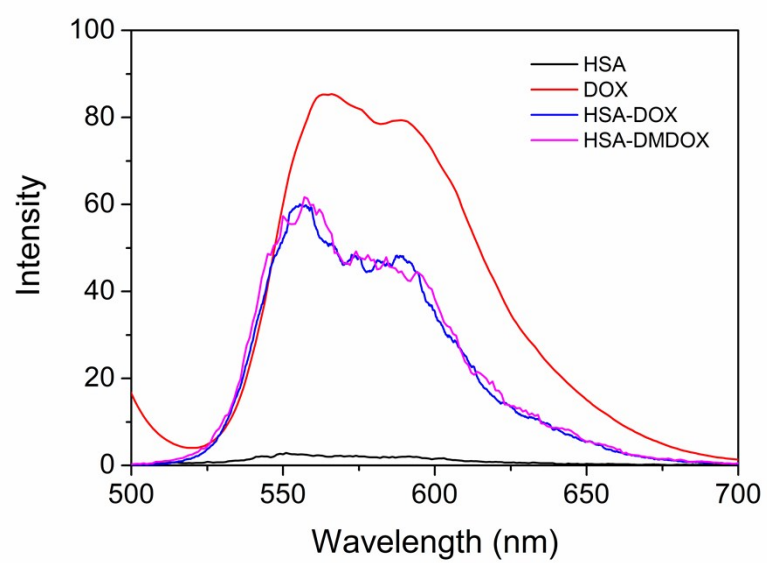

**Figure S4.** Fluorescence emission spectra (excited at 480 nm) of HSA, DOX, HSA-DOX and HSA-DMDOX.

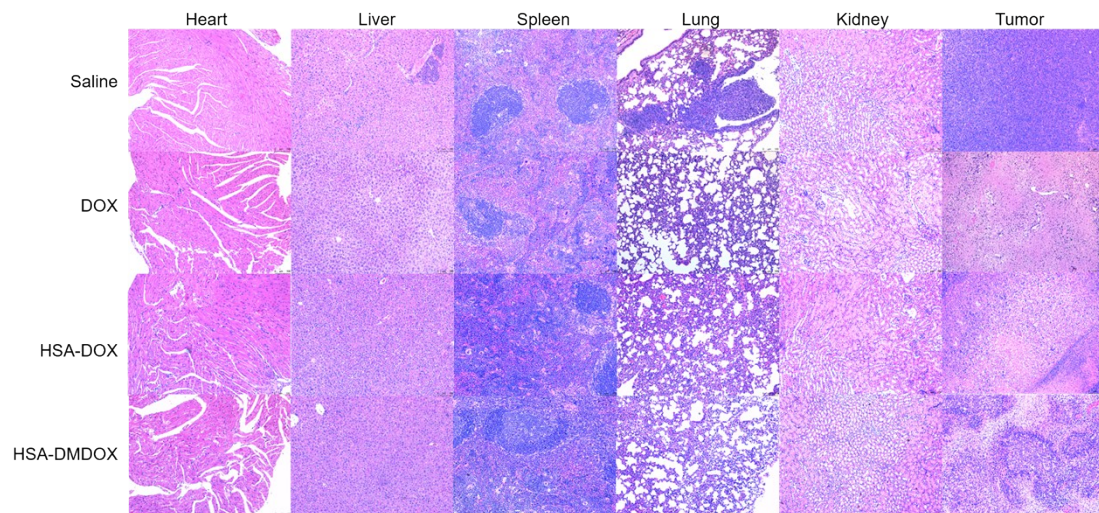

**Figure S5.** The H&E histological analysis (100×) of heart, liver, spleen, lung, kidney, and tumor in different groups (saline, DOX, HSA-DOX and HSA-DMDOX).
